# Supplementary material for: Low oxygen levels induce the expression of the embryonic morphogen Nodal
Source: PubMed Central journal article supplement — Mol Biol Cell. 2011 Dec 15;22(24):4809–21. doi: 10.1091/mbc.E11-03-0263 (PMC3237624; doi:10.1091/mbc.e11-03-0263), 2011-12-15
Supplement: supp_E11-03-0263_CombinedSupMats.pdf [file supp_E11-03-0263_CombinedSupMats.pdf]

## SUPPLEMENTAL INFORMATION

| Antibody                                  | Concentration and Use                                                       | Company                   |
|-------------------------------------------|-----------------------------------------------------------------------------|---------------------------|
| Mouse Anti-Nodal WS65                     | 1:500, WB<br>1:50, IF                                                       | Santa Cruz Biotechnology  |
| Mouse Anti- HIF-1 $\alpha$                | 1:500, WB<br>1:50, IF                                                       | BD Biosciences            |
| Rabbit Anti-HIF-1 $\alpha$<br>ChIP Grade  | 25 $\mu$ g for 15 x 10 <sup>6</sup> cells, ChIP                             | Abcam                     |
| Rabbit Anti-HIF-2 $\alpha$                | 1:1000, WB<br>1: 100, IF<br>25 $\mu$ g for 15 x 10 <sup>6</sup> cells, ChIP | Novus Biosciences         |
| Mouse Anti-DDK 4C5                        | 1:1000, WB                                                                  | OriGene Technologies      |
| Mouse anti- $\beta$ Actin C4              | 1:5000, WB                                                                  | Santa Cruz Biotechnology, |
| Rabbit Anti-Phospho-Smad2<br>(Ser465/467) | 1:1000, WB                                                                  | Cell Signaling Technology |
| Rabbit Anti-SMAD 2/3                      | 1:1000, WB<br>1:100, IF                                                     | Millipore                 |

**SI Table 1: Antibodies Utilized for Western Blot (WB), Immunofluorescence (IF) and Chromatin Immunoprecipitation (ChIP) Analyses**

## SUPPLEMENTAL FIGURE LEGENDS

**Supplementary Figure 1. Validation of experimental treatments and controls pertaining to Figures 1-4.** (A) Real-time RT-PCR analysis of *Lox* mRNA in T47D cells exposed to 0.5% O<sub>2</sub> for 0-48 hours. Results validate that LOX is up-regulated over time in response to hypoxia in T47D cells. Gene expression was normalized to RPLPO. Data is presented as mean  $\pm$  Standard Deviation (SD) relative to 20% O<sub>2</sub> control. Asterisks (\*) indicate a significant difference in gene expression compared to 20% O<sub>2</sub> (n=4, *P* < 0.05). (B) Representative amido black stained membranes from cyclohexamide stability assays depicted in Figure 1 to demonstrate equal protein loading. (C) Immunofluorescence of endogenous HIF-1 $\alpha$ , HIF-2 $\alpha$  or Nodal under normoxic (20% O<sub>2</sub>) or hypoxic (0.5% O<sub>2</sub>) conditions in T47D cells. (D) Immunofluorescence of endogenous HIF-1 $\alpha$ , HIF-2 $\alpha$  or Nodal under normoxic or hypoxic conditions in C81-61 cells. (E) IgG isotype controls in T47D and C81-61 cells corresponding to antibodies used for immunofluorescence. (F) Real-time RT-PCR analysis of *Lox* mRNA in T47D cells cultured in 20% O<sub>2</sub> (24 hours), 0.5% O<sub>2</sub> (24 hours), or 0.5% O<sub>2</sub> (24 hours) followed by re-oxygenation in 20% O<sub>2</sub> (24-72 hours). Results validate that hypoxia-induced LOX expression does not persist during re-oxygenation. Gene expression was normalized to RPLPO. Data is presented as mean  $\pm$  Standard Deviation (SD) relative to 20% O<sub>2</sub> control. Asterisks (\*) indicate a significant difference in gene expression compared to 20% O<sub>2</sub> controls (n=6, *P* < 0.05). (G) Immunoblot analyses of phosphorylated SMAD-2 and total SMAD-2/3 in MCF-7 and T47D cells cultured in

20% O<sub>2</sub> (24 hours) in the presence or absence of recombinant human Nodal (rhNodal; 50, 100 ng/mL). MCF-7 and T47D cells respond to rhNodal by increasing SMAD-2 phosphorylation.  $\beta$ -Actin is used as a loading control.

**Supplementary Figure 2. Sequence validation of DNA fragments isolated via ChIP.** (A) Sequence of Nodal NDE PCR product following chromatin immunoprecipitation (ChIP) on T47D cells using HIF-1 $\alpha$  antibody. Primer sequences are bolded and CSL binding sites are underlined. (B) Sequence of Nodal 2<sup>nd</sup> exon PCR product following chromatin immunoprecipitation (ChIP) on T47D cells using HIF-1 $\alpha$  antibody. Primer sequences are bolded.

**Supplemental Figure 1**

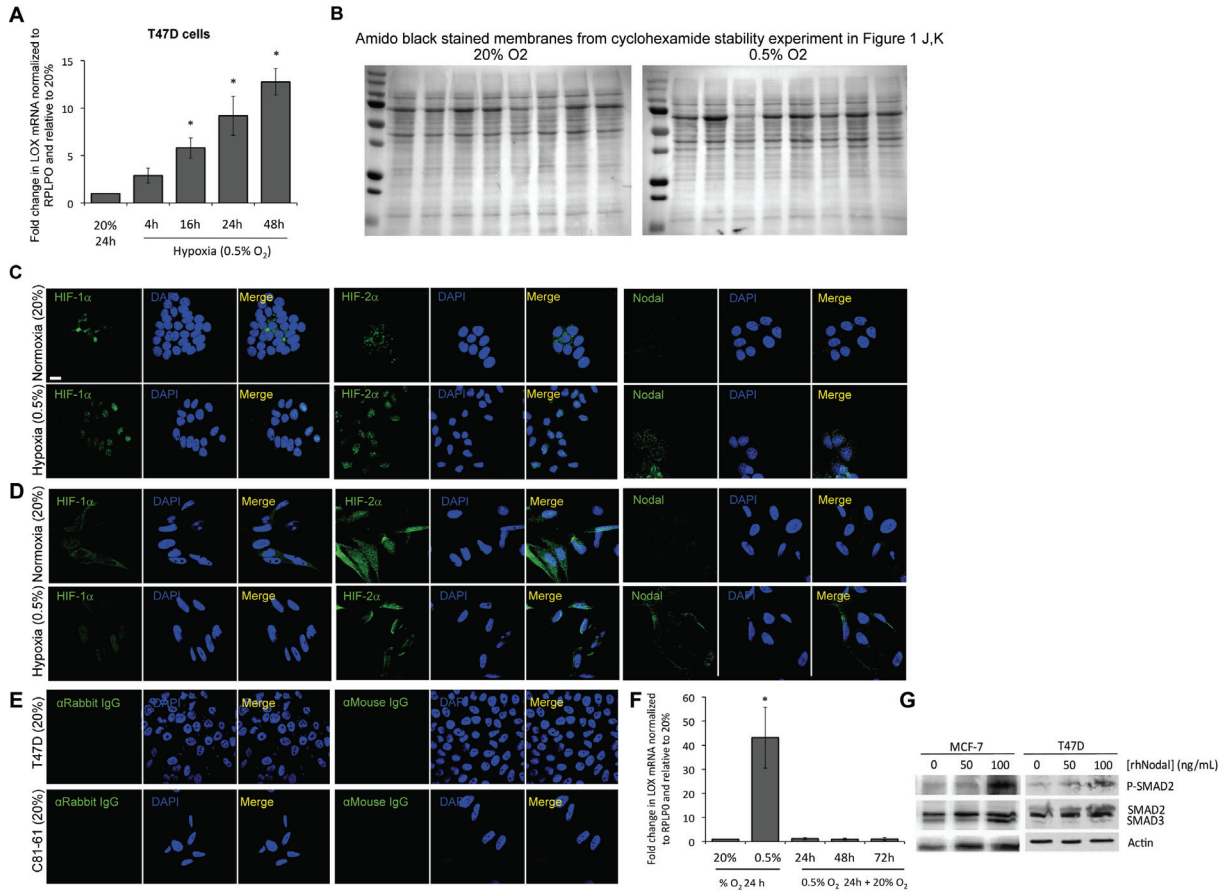

## Supplemental Figure 2

### A

Nodal NDE amplified region (354bp):

**TCTCTCTCTCTCAGAGCCTTTCTCCACCCCCAGGCTCAGAGTTAGGTCATCTCCAACCTCAACTTCA  
GCACCAGTGACTCCCCGTGGAGGGGAAGTGGGAAGGTGGGAGGCAGAGGCAGCTGGCCTGGGC  
TGATGGGAATCTCTGAGAAGCTTCCGGGGTGGGAGGGGAGGGCACCTCCTGGTGGTCTCTCTGT  
TTGTTTCAAAAACCTTCCATTCCGCGGGGTTCCAAGGCCAGGCTGTGCCTCACCTCCTGACCC  
TGTGGGAAGCGCAAGCCTCGACTTGGCTCCACCCCAAGAGGCTGGGGGGCCATGGGAGCAGGA  
GGAGCTTGAGCTTCAGAGTCAGACAGACC**

### B

Nodal 2<sup>nd</sup> Exon amplified region (202bp):

**CTTCTCCTTCCTGAGCCAACAAGAGGATCTGGCATGGGCTGAGCTCCGGCTGCAGCTGTCCAGCC  
CTGTGGACCTCCCCACTGAGGGCTCACTTGCCATTGAGATTTCCACCAGCCAAAGCCCGACACA  
GAGCAGGCTTCAGACAGCTGCTTAGAGCGGTTTCAGATGGACCTATT**CACTGTCACTTTGTCCCAG  
GTCACC****
